# Supplementary material for: Comparison of Missing Data Infilling Mechanisms for Recovering a Real-World Single Station Streamflow Observation
Source: Int J Environ Res Public Health. 2021 Aug 7;18(16):8375. doi: 10.3390/ijerph18168375 (PMC8394992; doi:10.3390/ijerph18168375)
Supplement: Supplementary file 1 [file ijerph-18-08375-s001.zip › ijerph-1301151-supplementary.pdf]

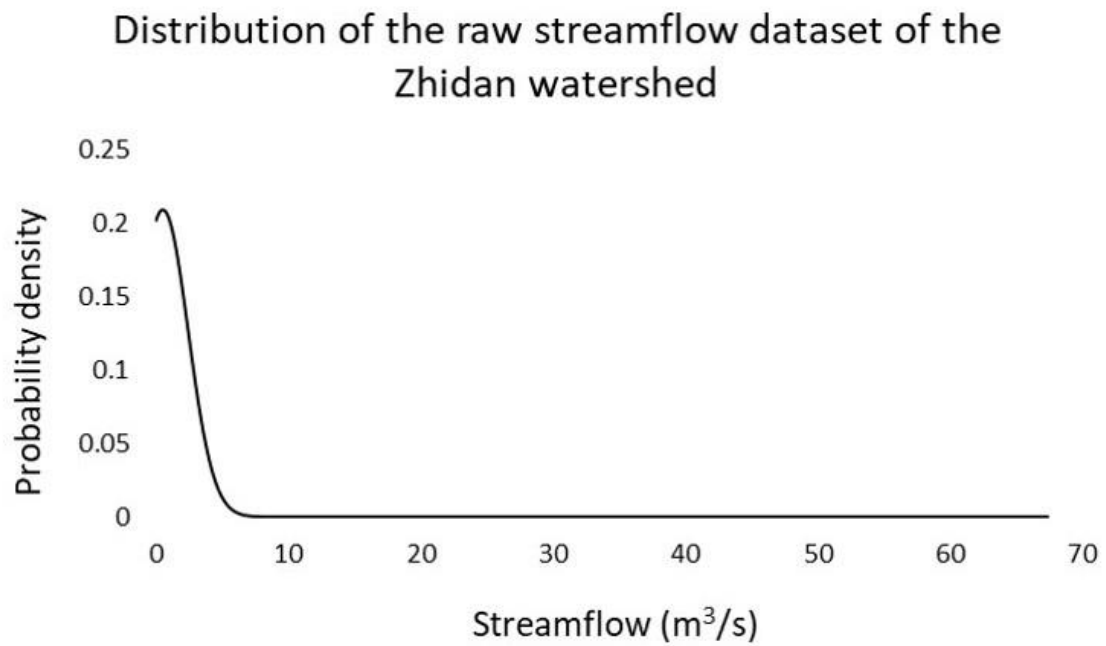

**Figure S1.** Distribution curve of the streamflow dataset of the Zhidan watershed.

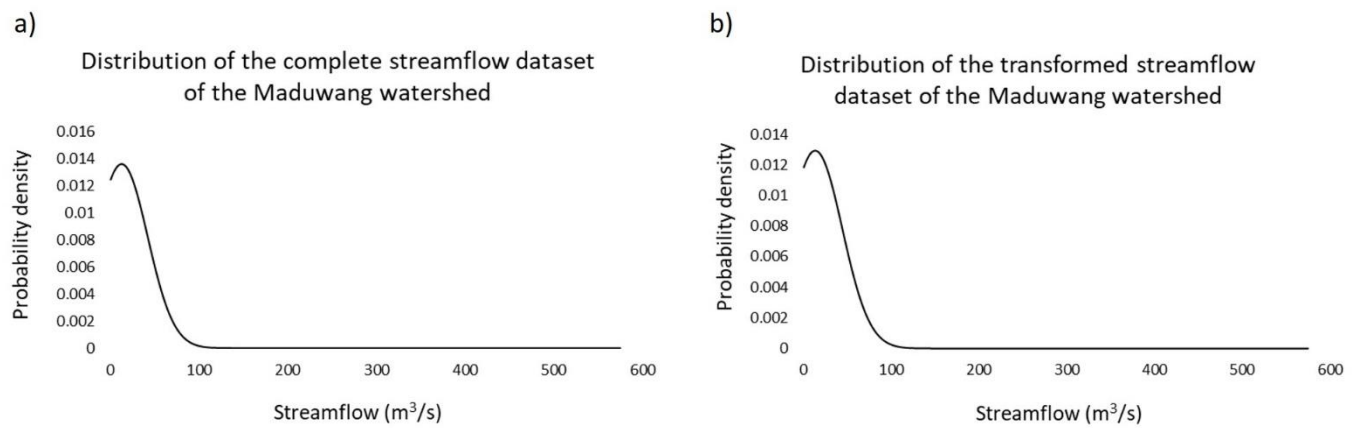

**Figure S2.** Distribution curve of the (a) complete and (b) transformed streamflow dataset of the Maduwang watershed.

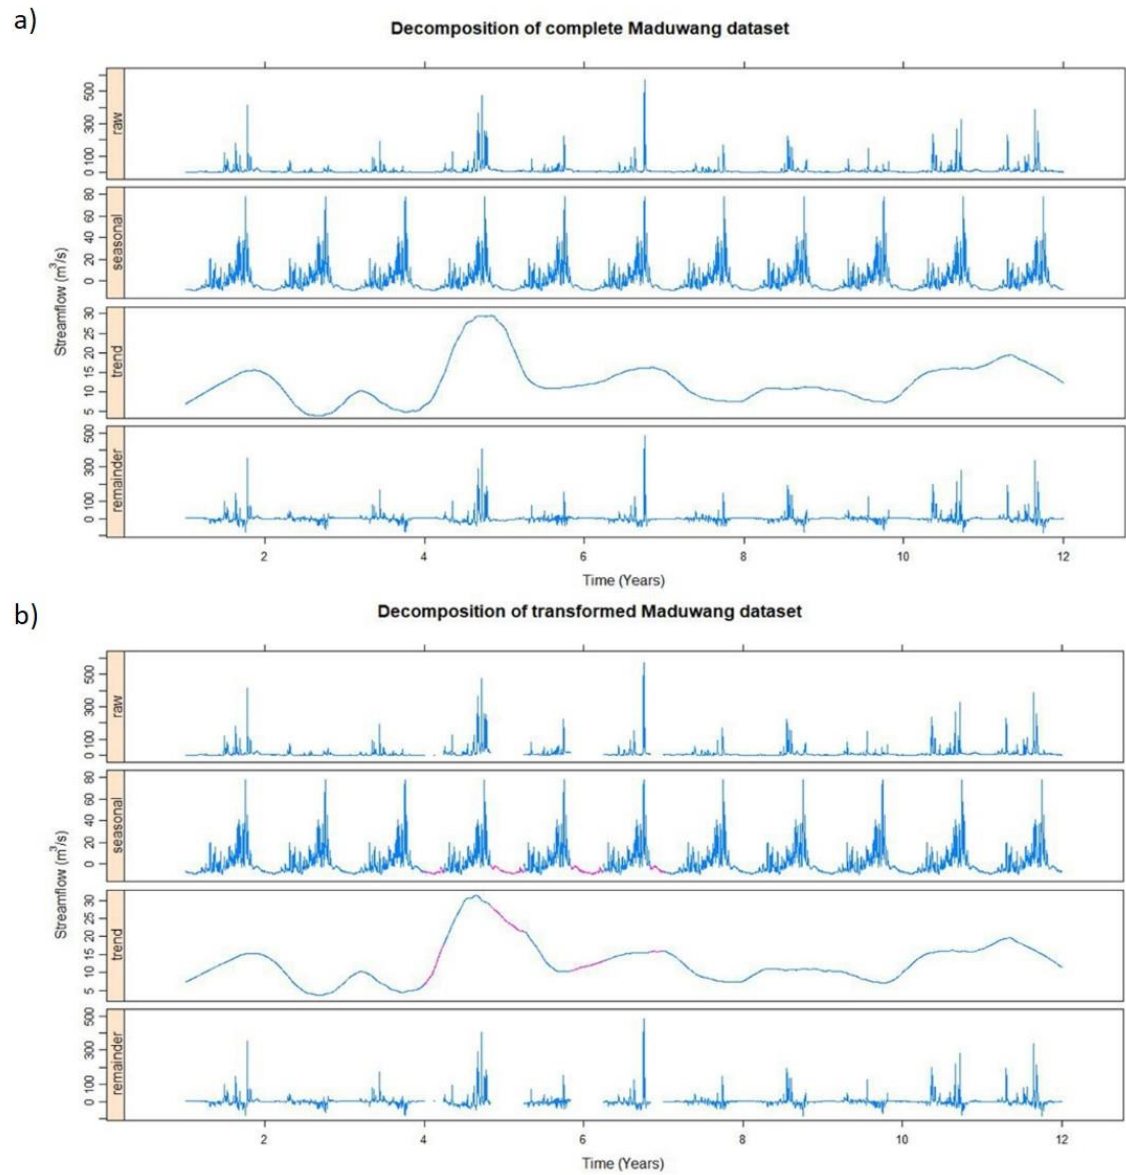

**Figure S3.** Time series decomposition of (a) complete and (b) transformed Maduwang dataset.

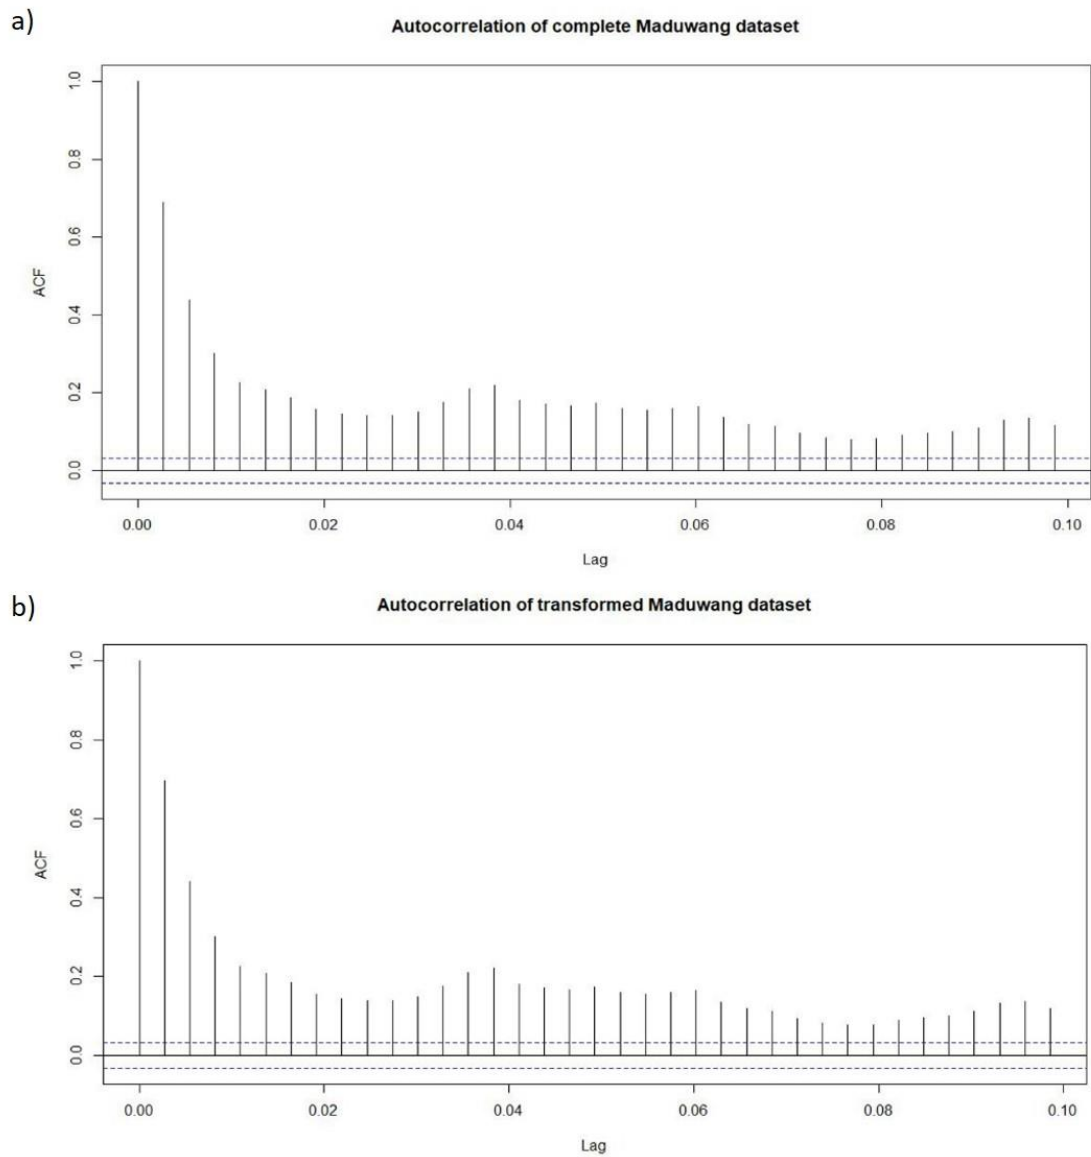

**Figure S4.** Autocorrelation of (a) complete and (b) transformed Maduwang dataset.

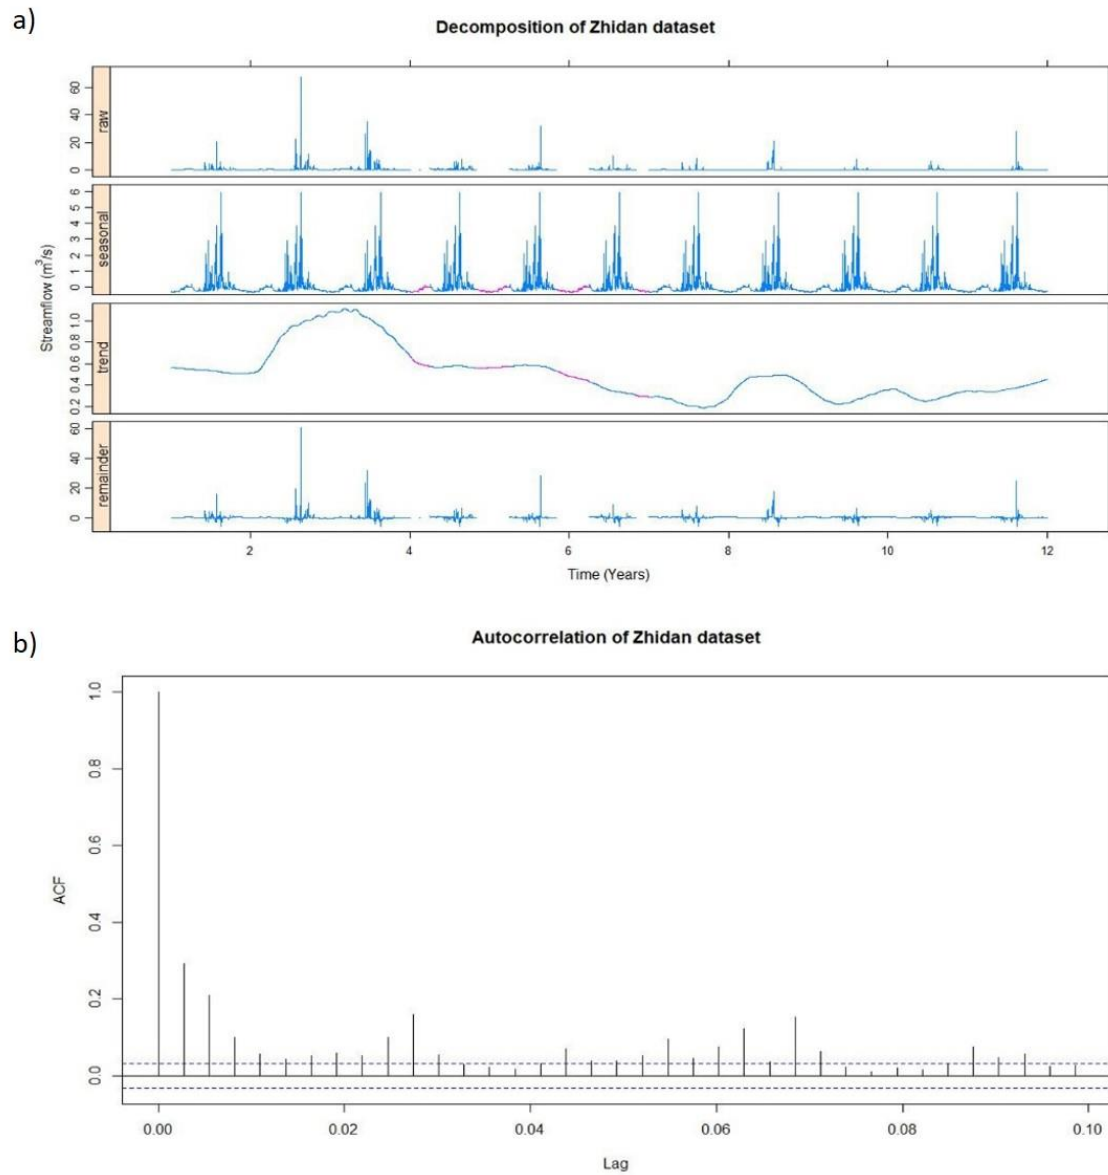

**Figure S5.** Results of (a) time series decomposition and (b) autocorrelation of the Zhidan dataset.
